# Supplementary material for: Involvement of a C-terminal motif in the interference of primate lentiviral Vpu proteins with CD1d-mediated antigen presentation
Source: PubMed Central journal article supplement (PMC4397644; doi:10.1038/srep09675), 2015-04-15
Supplement: srep09675-s1.pdf [file srep09675-s1.pdf]

## **Supplementary information**

### **Involvement of a C-terminal motif in the interference of primate lentiviral Vpu proteins with CD1d-mediated antigen presentation**

Susanna M. Bächle<sup>1</sup>, Daniel Sauter<sup>2</sup>, Sabrina Sibitz<sup>1</sup>, Johan K. Sandberg<sup>1</sup>, Frank Kirchhoff<sup>2</sup>, Markus Moll<sup>1\*</sup>

<sup>1</sup>Center for Infectious Medicine, Department of Medicine, Karolinska Institutet, Karolinska University Hospital Huddinge, 14186 Stockholm, Sweden

<sup>2</sup>Institute of Molecular Virology, Ulm University Medical Center, 89081 Ulm, Germany

\*Corresponding author

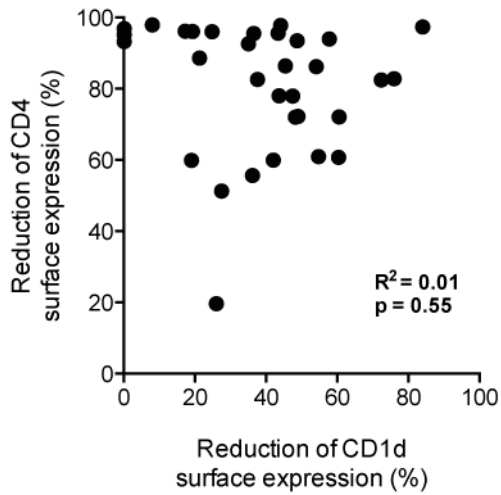

**Supplementary Figure S1 Down-regulation of CD1d and CD4 are mechanistically separable Vpu functions.**

Correlation between reduction of CD1d and CD4 surface expression induced by HIV-1 group M Vpu proteins was assessed using linear regression and Spearman correlation. Each symbol represents one *vpu* allele and the average value of at least three experiments.

**a**

NL4-3 Vpu transmembrane domain (TMD) mutants:

```
MQPIIVAIIVALVVAIIIAIVVWSIVIIIEYRKILRQRKIDRLIDRLIERAEDSGNESEGEVSALVEMGVEMGHHPWDIDDL  wild type
M-----EYRKILRQRKIDRLIDRLIERAEDSGNESEGEVSALVEMGVEMGHHPWDIDDL  ΔTMD
MIPIVIAIILAVAVQAIIVIVSVIIVEYRKILRQRKIDRLIDRLIERAEDSGNESEGEVSALVEMGVEMGHHPWDIDDL  RD
```

**b**

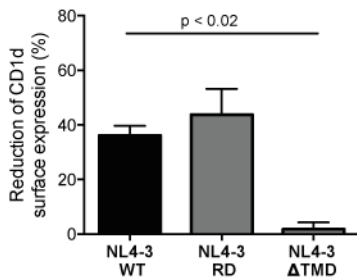

**c**

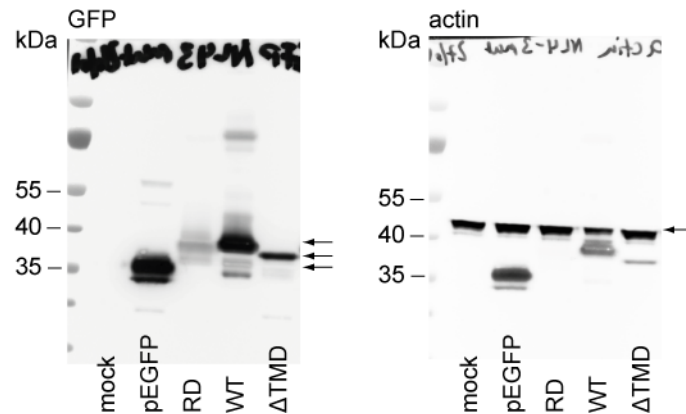

### Supplementary Figure S2 CD1d down-regulation by Vpu transmembrane domain mutants.

(a) Amino acid sequences of NL4-3 Vpu and TMD mutants VpuRD and VpuΔTMD; amino acid deletions are indicated by dashes, amino acid exchanges by bold letters. (b) 293T cells were co-transfected with CD1d and eGFP fusion constructs of the indicated Vpu proteins. At 24 h post transfection, CD1d surface expression was analyzed using flow cytometry. Average values from 3 independent experiments performed in duplicates ( $\pm$ SD) are shown. Statistical significance was assessed using one-way ANOVA with Dunnett's multiple comparisons test. (c) 293T cells were transfected with the indicated eGFP-tagged Vpu proteins. At 24 h post transfection, cell lysates were prepared and analyzed by Western Blot using HRP-conjugated anti-GFP antibody followed by mouse anti-actin antibody and HRP-conjugated anti-mouse IgG. Uncropped full-size blots are shown.

**a**

NL4-3 Vpu triple-alanine mutants 2.α helix:

|                                                                                      |           |
|--------------------------------------------------------------------------------------|-----------|
| MQPIIIVAIVALVVAIIIAIVVWSIVIIIEYRKILRQRKIDRLIDRLIERAEDSGNESEGEVSAALVEMGVEMGHHPWDIDDL  | wild type |
| MQPIIIVAIVALVVAIIIAIVVWSIVIIIEYRKILRQRKIDRLIDRLIERAEDSGNESEGEAAAALVEMGVEMGHHPWDIDDL  | 59-61A    |
| MQPIIIVAIVALVVAIIIAIVVWSIVIIIEYRKILRQRKIDRLIDRLIERAEDSGNESEGEAAAALVEMGVEMGHHPWDIDDL  | 60-62A    |
| MQPIIIVAIVALVVAIIIAIVVWSIVIIIEYRKILRQRKIDRLIDRLIERAEDSGNESEGEVAAAALVEMGVEMGHHPWDIDDL | 61-63A    |
| MQPIIIVAIVALVVAIIIAIVVWSIVIIIEYRKILRQRKIDRLIDRLIERAEDSGNESEGEVSAALVEMGVEMGHHPWDIDDL  | 62-64A    |
| MQPIIIVAIVALVVAIIIAIVVWSIVIIIEYRKILRQRKIDRLIDRLIERAEDSGNESEGEVSAALVEMGVEMGHHPWDIDDL  | 63-65A    |
| MQPIIIVAIVALVVAIIIAIVVWSIVIIIEYRKILRQRKIDRLIDRLIERAEDSGNESEGEVSAALVEMGVEMGHHPWDIDDL  | 64-66A    |
| MQPIIIVAIVALVVAIIIAIVVWSIVIIIEYRKILRQRKIDRLIDRLIERAEDSGNESEGEVSAALVEMGVEMGHHPWDIDDL  | 65-67A    |
| MQPIIIVAIVALVVAIIIAIVVWSIVIIIEYRKILRQRKIDRLIDRLIERAEDSGNESEGEVSAALVEMGVEMGHHPWDIDDL  | 66-68A    |
| MQPIIIVAIVALVVAIIIAIVVWSIVIIIEYRKILRQRKIDRLIDRLIERAEDSGNESEGEVSAALVEMGVEMGHHPWDIDDL  | 67-69A    |
| MQPIIIVAIVALVVAIIIAIVVWSIVIIIEYRKILRQRKIDRLIDRLIERAEDSGNESEGEVSAALVEMGVEMGHHPWDIDDL  | 68-70A    |
| MQPIIIVAIVALVVAIIIAIVVWSIVIIIEYRKILRQRKIDRLIDRLIERAEDSGNESEGEVSAALVEMGVEMGHHPWDIDDL  | ELV       |

**b**

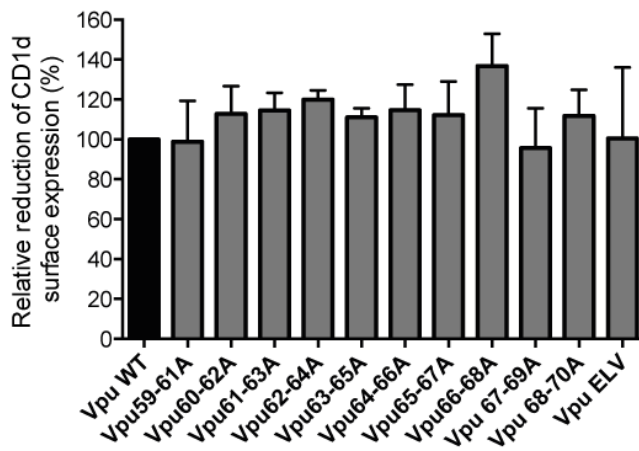

### Supplementary Figure S3 Analysis of triple-alanine mutants scanning through the second $\alpha$ -helix of NL4-3 Vpu.

(a) Amino acid sequences of NL4-3 Vpu and overlapping triple-alanine mutants scanning through the second  $\alpha$ -helix; bold letters indicate amino acid exchanges. (b) 293T cells were co-transfected with CD1d and the indicated C-terminally HA-tagged NL4-3 Vpu constructs, respectively. 24 h post transfection, cells were surface stained with anti-CD1d antibodies, permeabilized and stained with anti-HA antibody to detect Vpu-expressing cells. CD1d down-regulation by wild-type Vpu (VpuWT) was set to 100%. Average values from at least 3 independent experiments performed in duplicates ( $\pm$ SD) are shown. Statistical analysis was done using GraphPad Prism software and one-way ANOVA with Dunnett's multiple comparisons test.

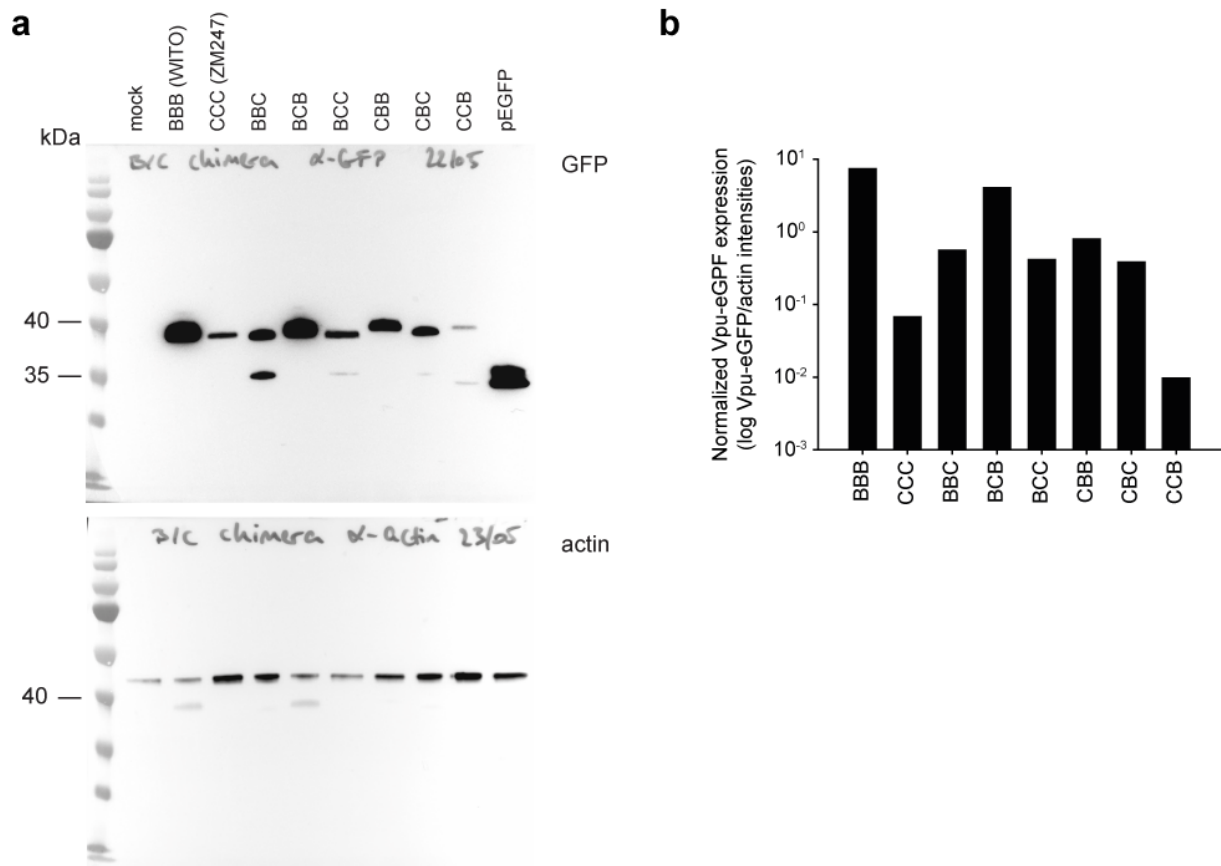

**Supplementary Figure S4 Expression of parental subtype B (WITO.c) and C (ZM247F) Vpu proteins and B/C chimeras.**

(a) 293T cells were transfected with the indicated eGFP-tagged Vpu proteins. At 24 h post-transfection, cell lysates were prepared and analyzed by Western Blot using HRP-conjugated anti-GFP and mouse anti-actin antibodies followed by HRP-conjugated anti-mouse IgG. Uncropped full-size blots are shown. (b) Vpu expression levels were quantified from the Western blot shown in panel A and normalized to actin.

**a**

**WITO (subtype B) Alanine scan mutants 2.α helix to C-terminus**

MQPLEILAVVALVVALILAI VVWTVVYIEYRKI QKQKKIDRLIDRIRERAEDSGNESDGDQEELSALVEMGHHPWDVNDE  
MQPLEILAVVALVVALILAI VVWTVVYIEYRKI QKQKKIDRLIDRIRERAEDSGNESDGD**AAAL**SALVEMGHHPWDVNDE  
MQPLEILAVVALVVALILAI VVWTVVYIEYRKI QKQKKIDRLIDRIRERAEDSGNESDGDQEEL**AAA**LVEMGHHPWDVNDE  
MQPLEILAVVALVVALILAI VVWTVVYIEYRKI QKQKKIDRLIDRIRERAEDSGNESDGDQEELS**AAAA**MGHHPWDVNDE  
MQPLEILAVVALVVALILAI VVWTVVYIEYRKI QKQKKIDRLIDRIRERAEDSGNESDGDQEELSALV**AAAA**HAPWDVNDE  
MQPLEILAVVALVVALILAI VVWTVVYIEYRKI QKQKKIDRLIDRIRERAEDSGNESDGDQEELSALVEMGH**AAAA**WDVNDE  
MQPLEILAVVALVVALILAI VVWTVVYIEYRKI QKQKKIDRLIDRIRERAEDSGNESDGDQEELSALVEMGHHP**AAA**NDE  
MQPLEILAVVALVVALILAI VVWTVVYIEYRKI QKQKKIDRLIDRIRERAEDSGNESDGDQEELSALVEMGHHPWDV**AAA**

WITO wild type  
61-63AAA  
64-66AAA  
67-69AAA  
70-72AAA  
73-75AAA  
76-78AAA  
79-81AAA

**b**

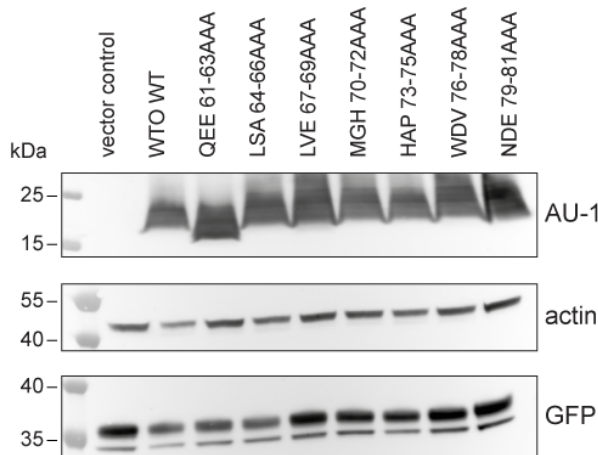

**c**

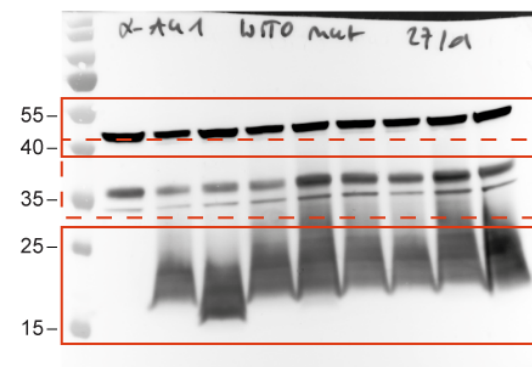

**Supplementary Figure S5 Expression of WITO Vpu triple-alanine mutants.**

(a) Schematic representation of WITO Vpu triple-alanine mutants; bold letters indicate amino acid exchanges. (b) 293T cells were transfected with pCG-IRES-eGFP plasmids encoding the indicated AU1-tagged Vpu proteins. At 24 h post transfection, cell lysates were prepared and analyzed by Western Blot using goat anti-AU1 and mouse anti-actin antibodies followed by HRP-conjugated anti-goat and anti-mouse IgG, respectively. HRP-conjugated anti-GFP staining served as transfection control. (c) Uncropped full-size blots with cropped regions indicated by red squares.

**a**

**WITO (subtype B) and ZM247F (subtype C) Vpu mutants**

```
MQPLEILAVVALVVALILAIVVWTIVYIEYRKIQKQKKIDRLIDRIRERAEDSGNESDGDQEELSALVEMGHHPWDVNDE      WITO  wild type
MQPLEILAVVALVVALILAIVVWTIVYIEYRKIQKQKKIDRLIDRIRERAEDSGNESDGDQEELSALVEMGHHRLLLDVNDE      APW/RLL
MQPLEILAVVALVVALILAIVVWTIVYIEYRKIQKQKKIDRLIDRIRERAEDSGNESDGDQEELSALVEMGHHPW-----      Δ5
MQPLEILAVVALVVALILAIVVWTIVYIEYRKIQKQKKIDRLIDRIRERAEDSGNESDGDQEELSALVEMG-----      Δ10

MLEDYKIAIAALIVALIIAIVVWTIVYIEYRKLVRQRKIDWLIKRIERAEDSGNESDGDQEELSTMVDMGHIRLLGAIIDL      ZM247F wild type
MLEDYKIAIAALIVALIIAIVVWTIVYIEYRKLVRQRKIDWLIKRIERAEDSGNESDGDQEELSTMVDMGHAPWGAIIDL      RLL/APW
MLEDYKIAIAALIVALIIAIVVWTIVYIEYRKLVRQRKIDWLIKRIERAEDSGNESDGDQEELSTMVDMGHIRLL-----      Δ5
MLEDYKIAIAALIVALIIAIVVWTIVYIEYRKLVRQRKIDWLIKRIERAEDSGNESDGDQEELSTMVDMG-----      Δ10
```

**b**

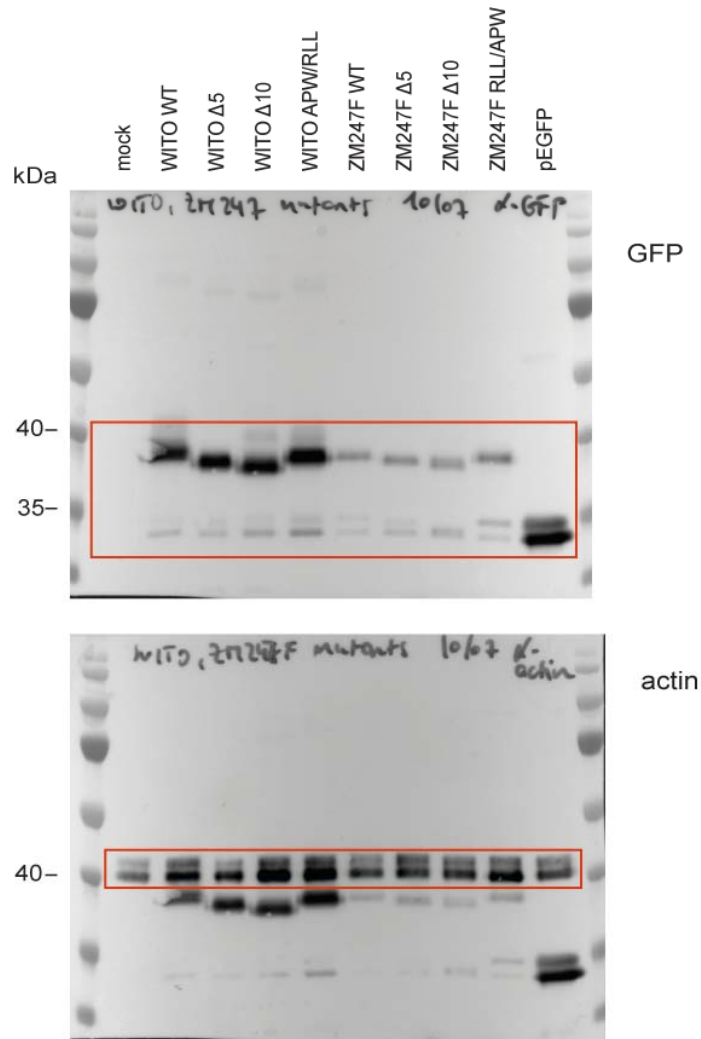

**Supplementary Figure S6**

(a) Schematic representation of WITO and ZM247F Vpu mutants; bold letters indicate amino acid exchanges, dashed indicate amino acid deletions. (b) Original uncropped full-size blots of Figure 5C; cropped regions are indicated by red squares.

**a**

**Vpu acute/chronic pairs provided by Dr. Lewinski (ref 50)**

Q303 Acute: MQPLQIVAVIVSLVIGAIIALVWVTIVLIEYRRILRQRKIDRLIERISERAEDSGNESEGDQEELSAL-VEMGHHAPWDVDDL  
Q303 Chronic: MQPLQIVAVIVSLVIGAVIALVWVTIVLIEYRRILRQRKIDRLIERISERAEDSGNESEGDQEELSAL-VEMGHHAPWDVDDL

N528 Acute: MPPLYISTIVALVIAAILAIVVWSIVIEYRKILKQRKIDRLIERISERAEDSGNESEGDQEELSAL-VERGHLAPWDVNDL  
N528 Chronic: MPPLYI-TIVALVIAVILAIVVWSIVIEYRKILKQRKIDRLIERISERAEDSGNESEGDQEELSAL-VERGHLAPWDVNDL

R611 Acute: MQILD-ISVAALVVALILAIIVWSIVIEYRKIVRQRKIDKLIDRIRERAEDSGNESEGDQEELSTLVVEMGHHAPWDINDL  
R611 Chronic: MQILD-ISVAALVVALILAIIVWSIVIEYRKIVRQRKIDKLIDRIRERAEDSGNESEGDQEELSTLVVEMGHHAPWDIHDL

N988 Acute: MQPLEIAAIVALVVAIIAIVVWSIVLIEYRKLLKQRKIDRLIDRIAERAEDSGNESEGDQEELSAL-MEMGHH**AP**WDVNDL  
N988 Chronic: MQ**SLK**IAAIVALVVAIIAIVVWSIVLIEYRKLLKQRKIDRLIDRIAERAEDSGNESEGDQEELSAL-MEMGHH**APG**VDVNDL

**b**

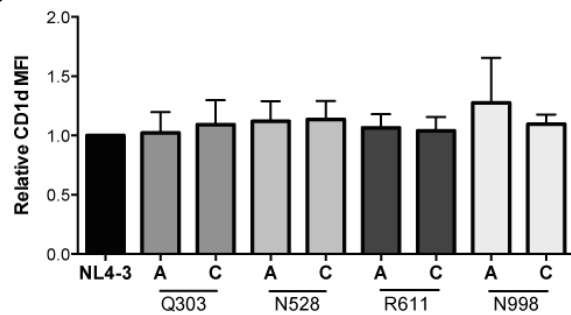

**c**

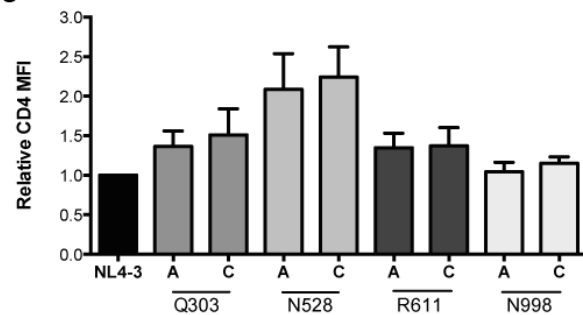

**Supplementary Figure S7 CD1d down-regulation by Vpu protein pairs isolated during acute and chronic phases of infection.**

(a) Amino acid sequences of acute and chronic Vpu protein pairs<sup>49</sup>. Differences between the pairs are highlighted in red; the APW motif is highlighted in bold. (b, c) 293T cells were co-transfected with CD1d or CD4 and the indicated Vpu protein pairs derived from viruses isolated during acute and chronic phases of infection. Data are expressed as surface MFIs relative to NL4-3 Vpu. Statistical analysis was done using one-way ANOVA with Sidak's multiple comparisons test. Average values from 3 independent experiments performed in duplicates ( $\pm$ SD) are shown.



**Supplementary Table S1 Overview of HIV-1 and SIV *vpu* alleles analyzed in this study.**

| HIV-1 Clone | Group/Subtype                                                       | GenBank Accession |
|-------------|---------------------------------------------------------------------|-------------------|
| NL4-3       | HIV-1 M/B                                                           | U26942            |
| 89.6        | HIV-1 M/B                                                           | U39362            |
| JR-CSF      | HIV-1 M/B                                                           | M38429            |
| YU-2        | HIV-1 M/B                                                           | M89973            |
| WITO.c      | HIV-1 M/B                                                           | AY835451          |
| RHPA.c      | HIV-1 M/B                                                           | AY835447          |
| THRO.c      | HIV-1 M/B                                                           | AY835448          |
| REJO.c      | HIV-1 M/B                                                           | AY835449          |
| CH040.c     | HIV-1 M/B                                                           | GQ925946          |
| CH058.c     | HIV-1 M/B                                                           | GQ925948          |
| CH077.t     | HIV-1 M/B                                                           | GQ925949          |
| CH106.c     | HIV-1 M/B                                                           | GQ925947          |
| KE.00       | HIV-1 M/C                                                           | AF457054          |
| ZM246F      | HIV-1 M/C                                                           | FJ496185          |
| ZM247F      | HIV-1 M/C                                                           | FJ496195          |
| CH198       | HIV-1 M/C                                                           | KC156130          |
| ZM249       | HIV-1 M/C                                                           | DQ388514          |
| CH167       | HIV-1 M/C                                                           | KC156213          |
| CH293       | HIV-1 M/C                                                           | KC156216          |
| CH432       | HIV-1 M/C                                                           | KC156218          |
| CH534       | HIV-1 M/C                                                           | KC156221          |
| SE.95       | HIV-1 M/A1                                                          | AF069673          |
| CY.94       | HIV-1 M/A2                                                          | AF286237          |
| UG.99       | HIV-1 M/D                                                           | AF484498          |
| ZA.90       | HIV-1 M/D                                                           | EF633445          |
| BE.93       | HIV-1 M/F1                                                          | AF077336          |
| CM.02       | HIV-1 M/F2                                                          | AY371158          |
| PT.x        | HIV-1 M/G                                                           | AY612637          |
| GH.03       | HIV-1 M/G                                                           | AB287004          |
| BE.93       | HIV-1 M/H                                                           | AF190128          |
| SE.94       | HIV-1 M/J                                                           | AF082395          |
| CD.97       | HIV-1 M/K                                                           | AJ249235          |
| MVP13127    | HIV-1 O                                                             | AF316856          |
| 9435        | HIV-1 O                                                             | GQ925939          |
| HJ001       | HIV-1 O                                                             | GQ925937          |
| HJ100       | HIV-1 O                                                             | GQ925943          |
| HJ162       | HIV-1 O                                                             | GQ925941          |
| HJ256       | HIV-1 O                                                             | GQ925940          |
| HJ389       | HIV-1 O                                                             | GQ925945          |
| HJ428       | HIV-1 O                                                             | GQ925942          |
| HJ736       | HIV-1 O                                                             | GQ925944          |
| HJ036       | HIV-1 O                                                             | GQ925938          |
| YBF30       | HIV-1 N                                                             | AJ564926          |
| 2693BA      | HIV-1 N                                                             | GQ925950          |
| CK1.62      | HIV-1 N                                                             | GQ925951          |
| 06CM-U14842 | HIV-1 N                                                             | GQ324958          |
| 06CM-U14296 | HIV-1 N                                                             | GQ324962          |
| 02CM-SJGddd | HIV-1 N                                                             | GQ324959          |
| RBF168      | HIV-1 P                                                             | GQ328744          |
| U14788      | HIV-1 P                                                             | HQ179987          |
|             |                                                                     |                   |
| SIV Clone   | Species Subspecies                                                  | GenBank Accession |
| GAB1        | SIVcpzPtt (Chimpanzee, <i>Pan troglodytes troglodytes</i> )         | X52154            |
| MB66        | SIVcpzPtt                                                           | DQ373063          |
| MT145       | SIVcpzPtt                                                           | DQ373066          |
| LB7         | SIVcpzPtt                                                           | DQ373064          |
| EK505       | SIVcpzPtt                                                           | DQ373065          |
| MB897       | SIVcpzPtt                                                           | EF535994          |
| CP2139      | SIVgor (Gorilla, <i>Gorilla gorilla gorilla</i> )                   | FJ424866          |
| gsn71       | SIVgsn (Greater spot-nosed monkey, <i>Cercopithecus nictitans</i> ) | AF468658          |
| gsn166      | SIVgsn                                                              | AF468659          |
| monCML1     | SIVmon (Mona monkey, <i>Cercopithecus mona</i> )                    | AY340701          |
| mus1085     | SIVmus (Mustached monkey, <i>Cercopithecus cephus</i> )             | AY340700          |
| muss1239    | SIVmus                                                              | EF070330          |
| muss2500    | SIVmus                                                              | EF070331          |
